# Supplementary material
Source: MDPI journal article supplement (https://www.mdpi.com/2039-4403/14/1/31)
Supplement: s1 [file s1]

**QUESTIONNAIRE S1. ORIGINAL QUESTIONNAIRE ADMINISTERED TO THE PATIENTS**

1. Do you know the Charter of Patient Rights and Responsibilities?
  - Yes, totally - No
  - Yes, at some extent - DK/NR
2. Did the nursing team professionals identify themselves when entering your room to make any intervention?
  - Yes, totally - No
  - Yes, at some extent - DK/NR
3. Did you want to be more involved in the decision making of your care and treatment?
  - Yes, totally - No
  - Yes, at some extent - DK/NR
4. Did the nursing team take care of you and your family/relatives to help you and teach you self-care?
  - Yes, totally - No
  - Yes, at some extent - DK/NR
5. Did the nurse spend enough time when informing you about your illness related care?
  - Yes, always - No
  - Yes, sometimes - No, gave no information
  - DK/NR
6. Did the nurse explained all you wanted to know about treatment effects?
  - Yes, totally - No
  - Yes, at some extent - DK/NR
7. When the nurse explained to you your illness aspects, did she try to avoid other patients from hearing her (e.g. spoke in quiet voice, drawing separation curtain)?
  - Yes, always - I was in a single room
  - Sometimes
  - No - DK/NR
8. Did the nursing team members address you by your name?
  - Yes, always - No
  - Sometimes - DK/NR
9. The nursing team, did help your hospital stay to be more bearable in the absence of your family or relatives?
  - Yes, totally - No

- Yes, at some extent
- DK/NR

**10.** When you had questions, did you get clear and easy to understand answers from nursing staff?

- Yes, always
- I had no questions
- Yes, at some extent
- DK/NR
- No

**11.** Do you consider the relation with the nursing team close?

- Yes, totally
- No
- Yes, at some extent
- DK/NR

**12.** Did the nurses encouraged you to ask about your illness or any other aspect related to it?

- Yes, totally
- No
- Yes, at some extent
- DK/NR

**13.** Did you feel pain at some stage?

- Yes
- No
- DK/NR

**14.** Did the nursing team try to protect your intimacy while admitted in the hospital? (e.g. when examinations were carried out, bed bathing, going to the toilet or change of clothes)

- Yes, totally
- Not needed as I could do everything by myself
- At some extent
- DK/NR
- No

**15.** Did the nurse explain in a comprehensive way what the medications you had to have at home were for?

- Yes, totally
- Didn't need explanations
- Yes, at some extent
- Didn't have to take medications
- No
- DK/NR

**16.** Do you think the nurse did as much as she could to relief your pain?

- Yes, totally
- No
- Yes, at some extent
- DK/NR

**17.** Did the nurse informed you about your right to reject treatments or tests?

- Yes, totally
- No
- Yes, at some extent
- DK/NR

**18.** Were you able to identify the different members of the healthcare team?

- Yes, totally
- No, I couldn't differentiate team members who took care of me
- Only physicians who took care of me - DK/NR
- Only nurses who took care of me

**19.** At any time during your admission, did the nursing team commented on issues not related to you in front of you?

- Yes, very often
- No
- Sometimes
- DK/NR

**20.** In general, did you feel treated with respect by the nursing team during your stay in the hospital?

- Yes, always
- No
- Sometimes
- DK/NR

**21.** Did the nurse talk to you about the warning signs related to your disease or treatment which you should be careful about?

- Yes, totally
- No
- Yes, at some extent
- DK/NR

**22.** Did the nursing team look after your comfort and facilitate your rest?

- Yes, always
- No
- Sometimes
- DK/NR

**23.** Did the nurse provide all the necessary information to your family or relatives to help with your recovery?

- Yes, totally
- my family didn't need or want any information
- At some extent
- I didn't want any of my next of kin or friends
- No
- talk to the nurse
- There were no family members or relatives involved
- DK/NR

**24.** Did the nurse inform you about your right to know about what is written in your medical record?

- Yes, totally
- No
- Yes, at some extent
- DK/NR

**25.** Did you feel the nursing team was working in team and was well organized?

- Yes, always
- No
- Sometimes
- DK/NR

**26.** Did the nurse verify your identity (name, room number, bed...) before giving medication, blood withdrawal...?

- Yes, always
- Sometimes
- No
- DK/NR

**27.** Did the nursing team show interest for your family or relatives' comfort?

- Yes, always
- Sometimes
- No
- DK/NR

**28.** Did the nurse explain the possible side effects of the medication that you should take into account?

- Yes, totally
- At some extent
- No
- Didn't need explanations
- Didn't have to take any medication
- DK/NR

**29.** Did the nurse explained anything you wished to know about any type of care/techniques provided to you?

## **QUESTIONNAIRE S2. THE LIST OF ITEMS CONFORMING THE FINAL QUESTIONNAIRE**

### **Interrelationships: 11, 22, 25**

- Do you consider the relation with the nursing team close?
- Did the nursing team look after your comfort and facilitate your rest?
- Did you feel the nursing team was working in team and was well organized?

### **Nursing care: 2, 4, 5, 14, 27**

- Did the nursing team professionals identify themselves when entering your room to make any intervention?
- Did the nursing team take care of you and your family/relatives to help you and teach you self-care?
- Did the nurse spend enough time when informing you about your illness related care?
- Did the nursing team try to protect your intimacy while admitted in the hospital? (e.g. when examinations were carried out, bed bathing, going to the toilet or change of clothes)
- Did the nursing team show interest for your family or relatives' comfort?

### **Information during hospital stay: 6, 10, 12**

- Did the nurse explained all you wanted to know about treatment effects?
- When you had questions/ concerns, did you get clear and easy to understand answers from nursing staff?
- Did the nurses encouraged you to ask about your illness or any other aspect related to it?

**Patient's rights information: 17, 24**

- Did the nurse informed you about your right to reject treatments or test?
- Did the nurse inform you about your right to know about what is written in you medical record?

**Discharge information: 15, 21, 23, 28**

- Did the nurse explain in a comprehensive way what the medications you had to have at home were for?
- Did the nurse talk to you about the warning signs related to your disease or treatment which you should be careful about?
- Did the nurse provide all the necessary information to your family or relative to help with your recovery?
- Did the nurse explain the possible side effects of the medication that you should take into account?

**Pain related: 13, 16**

- Did you feel pain at some stage?
- Do you think the nurse did as much as she could to relief your pain?
